# Supplementary material for: Dimethyl Sulfoxide (DMSO) Decreases Cell Proliferation and TNF-α, IFN-γ, and IL-2 Cytokines Production in Cultures of Peripheral Blood Lymphocytes
Source: MDPI journal article supplement (doi:10.3390/molecules22111789), 2017-11-10
Supplement: s1 [file s1]

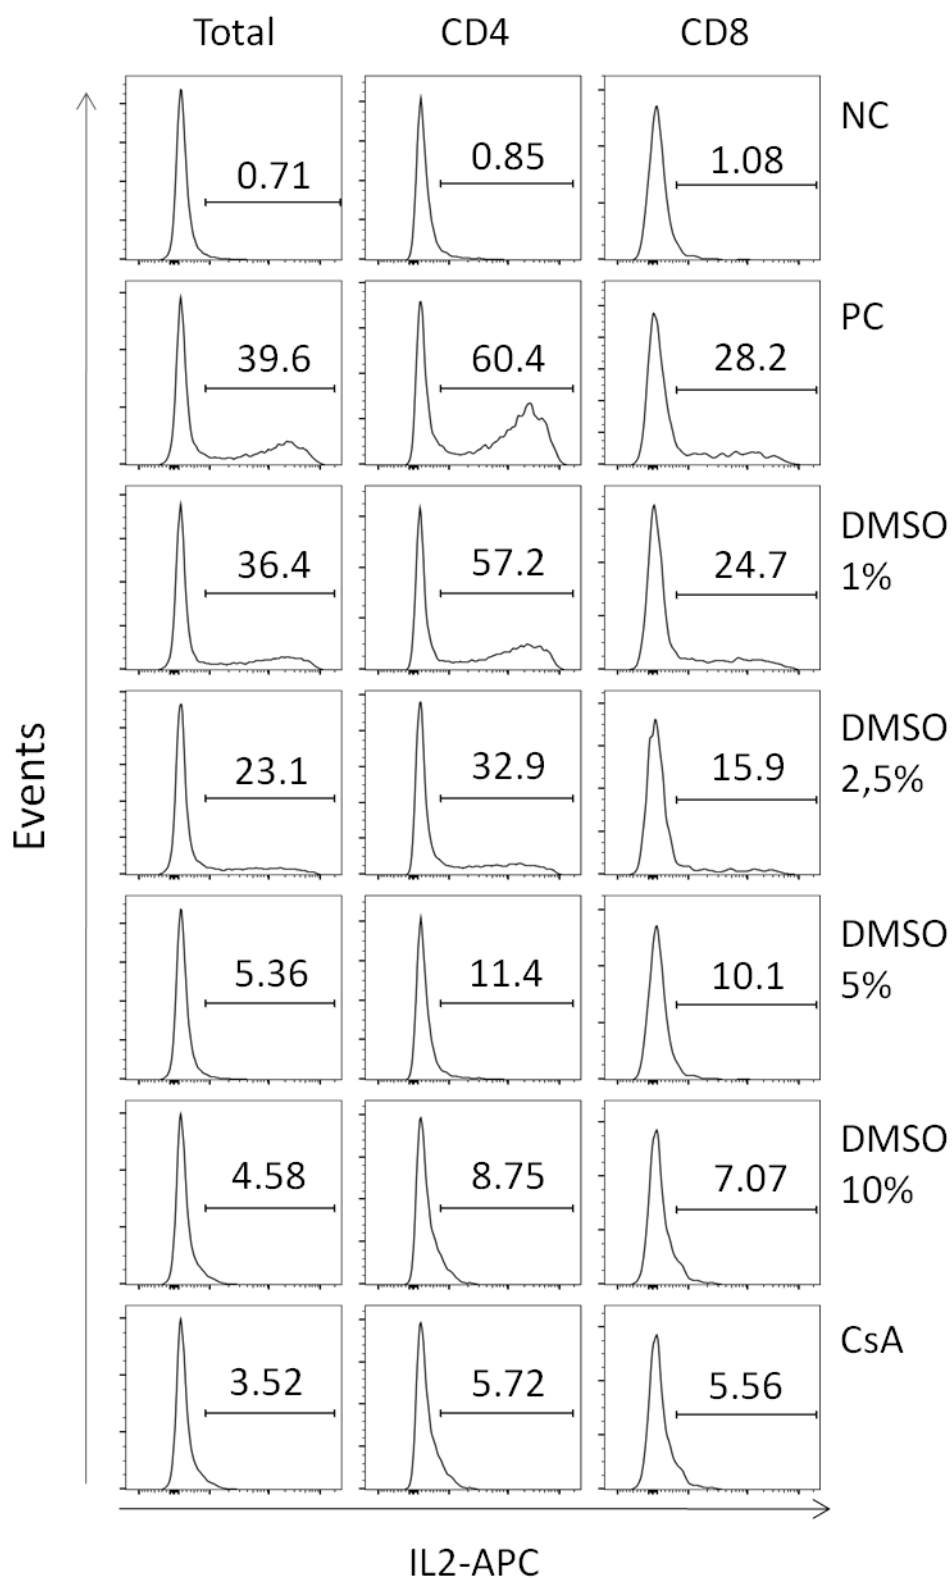

**Supplementary figure 1.** Representative histograms of the percentage of lymphocytes-IL-2<sup>+</sup> by flow cytometry in untreated cultures (NC), stimulated with PMA (PC), stimulated with PMA in the last 4 hours in a total of 8 hours of DMSO treatment at 1; 2.5; 5. or 10% v/v or 5 µg/mL of cyclosporine (CsA).

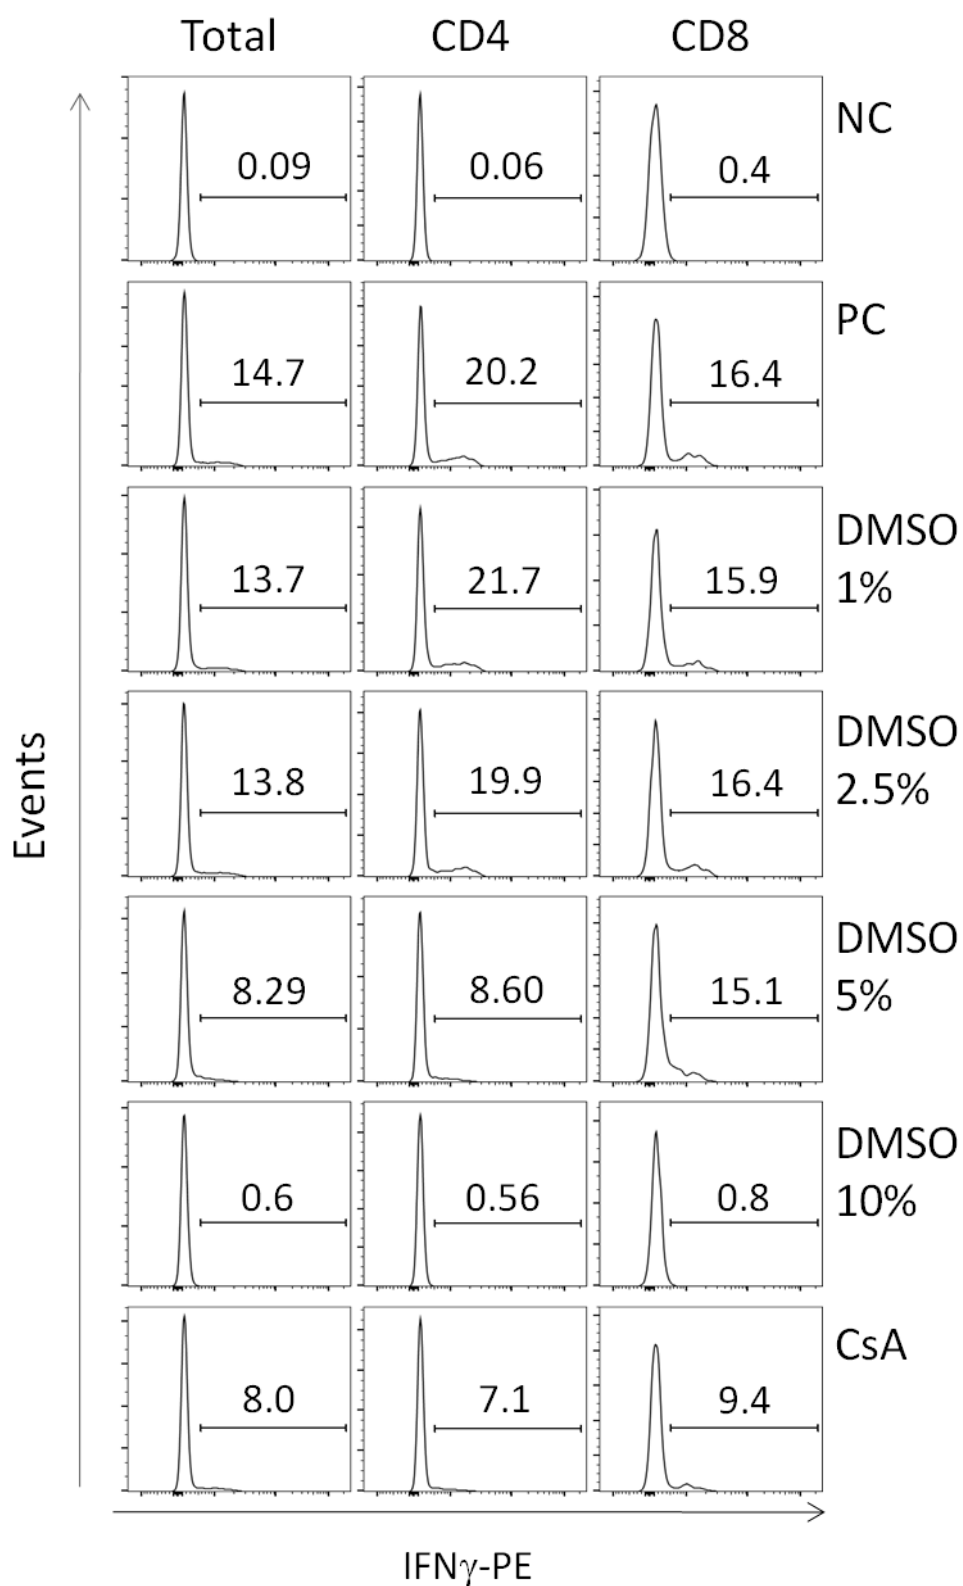

**Supplementary figure 2.** Representative histograms of the percentage of lymphocytes-IFN- $\gamma$  by flow cytometry in untreated cultures (NC), stimulated with PMA (PC), stimulated with PMA in the last 4 hours in a total of 8 hours of DMSO treatment at 1; 2.5; 5. or 10% v/v or 5  $\mu$ g/mL of cyclosporine (CsA).

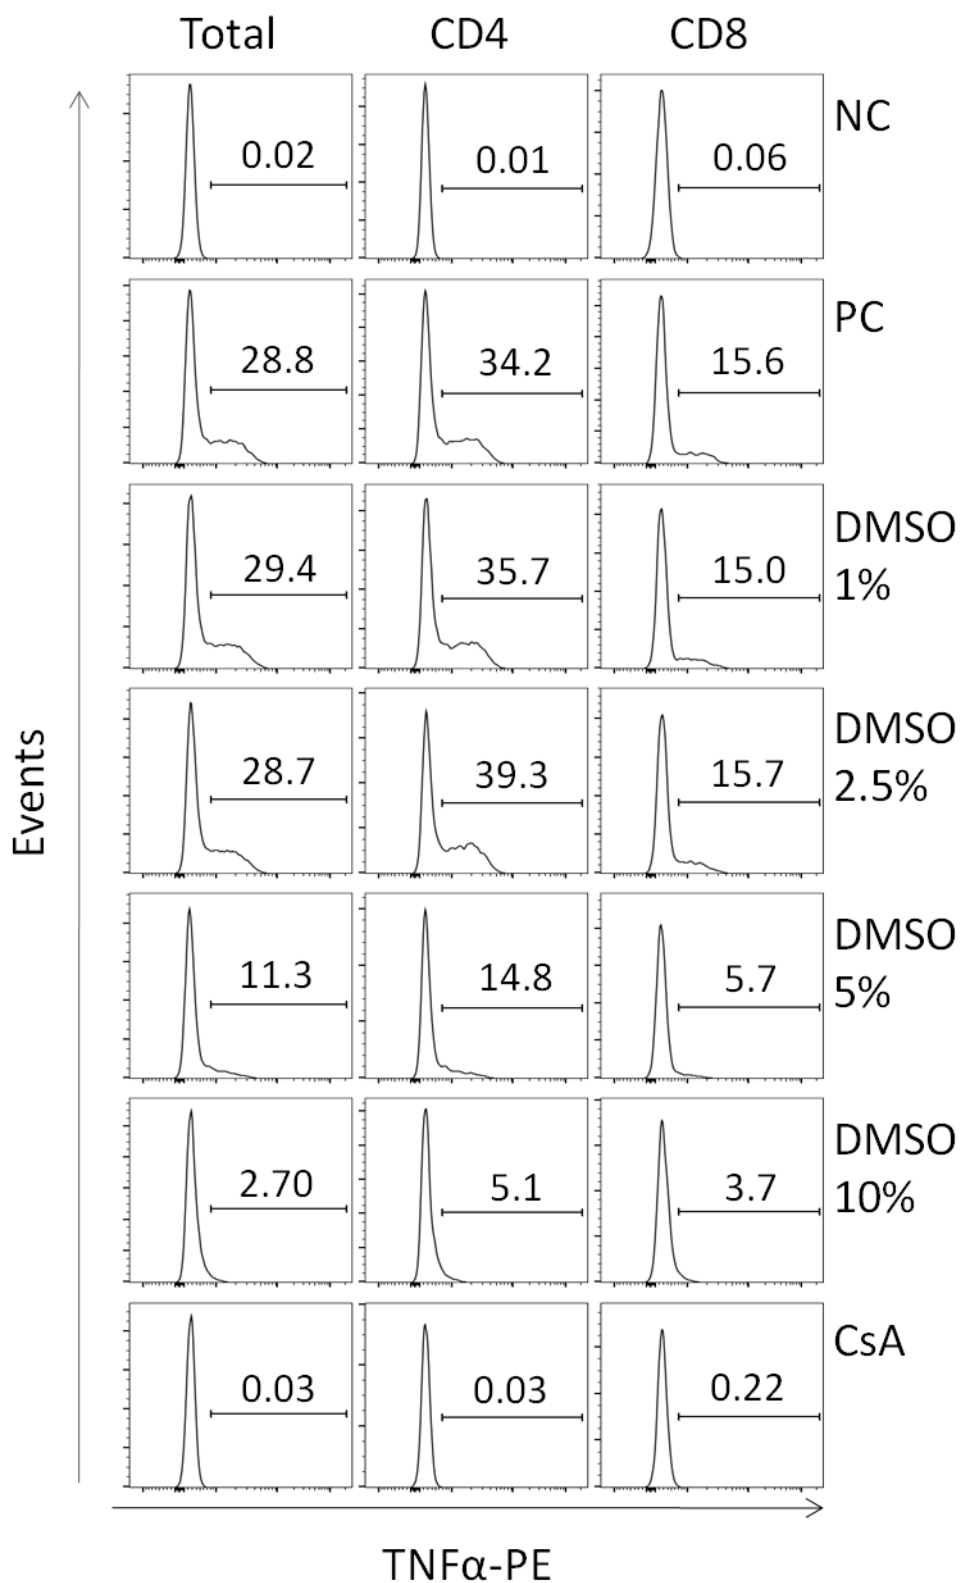

**Supplementary figure 3.** Representative histograms of the percentage of lymphocytes-TNF- $\alpha^+$  by flow cytometry in untreated cultures (NC), stimulated with PMA (PC), stimulated with PMA in the last 4 hours in a total of 8 hours of DMSO treatment at 1; 2.5; 5. or 10% v/v or 5  $\mu$ g/mL of cyclosporine (CsA).
